# Supplementary material
Source: PubMed Central journal article supplement (PMC8924722)

## Supplemental Online Content

Azoulay E, Resche-Rigon M, Megarbane B, et al. Association of COVID-19 acute respiratory distress syndrome with symptoms of posttraumatic stress disorder in family members after ICU discharge. *JAMA*. doi:10.1001/jama.2022.2017

**eTable 1.** Main Characteristics of the 23 Participating ICUs

**eTable 2.** Assessment of the 135 Bereaved Relatives on Day 90 After ICU Discharge

**eTable 3.** Characteristics of Patients Who Provided Informed Consent

**eTable 4.** Assessment of the Patients on Day 90 After ICU Discharge

**eTable 5.** Day 90 Outcomes in 307 Surviving Patients

**eTable 6.** Multivariable Analysis: Independent Determinants of Symptoms of Anxiety and Depression in the Family Members

**eTable 7.** Day 90 Outcomes in 517 Family Members of COVID-19 and Non-COVID-19 Patients After Multiple Imputation

**eTable 8.** Independent Determinants of PTSD-Related Symptoms in Family Members Including Center Effect

**eTable 9.** Independent Determinants of PTSD-Related Symptoms in Family Members After Multiple Imputation

**eTable 10.** Independent Determinants of PTSD-Related Symptoms Defined by Score Greater Than 26

**eFigure 1.** Study Design

**eFigure. 2** Patients' Flow Diagram

**eFigure 3.** Health-Related Quality of Life in Patients Who Were Alive at 90 Days

**eFigure 4.** Mental (Left) and Physical (Right) Components Scores of the SF-36 in Patients With COVID-19 (Red) vs Non-COVID-19 (Blue) ARDS 90 Days After ICU Discharge

This supplemental material has been provided by the authors to give readers additional information about their work.

**eTable 1.** Main Characteristics of the 23 Participating ICUs

| ICU characteristics<br>Number (%) or Median [IQR]                           | Before the<br>pandemic | During the<br>pandemic |
|-----------------------------------------------------------------------------|------------------------|------------------------|
| <b>University-affiliated hospitals</b>                                      | 16 (70)                | 16 (70)                |
| <b>Number of beds (baseline / during the pandemic)</b>                      | 20 [15-25]             | 32 [26/37]             |
| <b>Number of nurses (baseline / during the pandemic)</b>                    | 48 [38-57]             | 69 55-83]              |
| <b>Patient to nurse ratio</b>                                               | 2.5 (2.5-2.5)          | 2.5 (2.5-2.5)          |
| <b>Number of nursing assistants (baseline / during the pandemic)</b>        | 30 [22-35]             | 42 [30-52]             |
| <b>Number of senior physicians (baseline / during the pandemic)</b>         | 10 [8-12]              | 13 [11-15]             |
| <b>Number of residents (baseline / during the pandemic)</b>                 | 8 [7-11]               | 12 [10-15]             |
| <b>Ranking by ICU head (0 never-10 always):</b>                             |                        |                        |
| Nurses participate in clinical rounds                                       | 8 [5-9]                |                        |
| Nurses can initiate an end-of-life discussion                               | 8 [7-9]                |                        |
| Palliative care service used for end-of-life care                           | 9 [7-10]               |                        |
| <b>Psychologist available</b>                                               | 16 (70)                |                        |
| <b>Nurses take part in family information</b>                               | 22 (96)                |                        |
| <b>Visitation policies before the COVID-19 pandemic</b>                     |                        |                        |
| Visiting hours per day                                                      |                        |                        |
| Open visitation policies                                                    | 13 (57%)               |                        |
| >12 hours per day                                                           | 10 (43%)               |                        |
| Numbers of visitors allowed at the same time in the room                    | 2 (2-2)                |                        |
| Presence of navigators                                                      | 0                      |                        |
| Social worker available for the family members                              | 23 (100%)              |                        |
| Chaplaincy available                                                        | 23 (100%)              |                        |
| <b>Total COVID-19 patients managed</b>                                      |                        | 478 [350-780]          |
| <b>Number of professionals who contracted COVID-19</b>                      |                        | 108 / 1736 (6.2)       |
| <b>Communication was modified for COVID-19 families</b>                     |                        | 22 (96)                |
| - <i>Routine telephone call set up by one of the clinicians<sup>a</sup></i> |                        | 19 (83)                |
| - <i>Videoconferences set up with family and clinicians<sup>a</sup></i>     |                        | 6 (26)                 |
| - <i>Clinicians wrote their name on their PPE</i>                           |                        | 4 (17)                 |
| - <i>ICU visits allowed</i>                                                 |                        |                        |
| - <i>* no ICU visit allowed</i>                                             |                        | 0                      |
| - <i>* for one person only</i>                                              |                        | 16 (70)                |
| - <i>* for a limited time</i>                                               |                        | 15 (65)                |
| - <i>* unrestricted visits</i>                                              |                        | 7 (30)                 |
| - <i>* unrestricted visits for relatives of dying patients</i>              |                        | 19 (83%)               |
| - <i>* relatives declined ICU visits</i>                                    |                        | 12 (52)                |

<sup>a</sup>physicians and nurses

φ in the eight ICUs who allowed family members to visit the patient

**eTable 2.** Assessment of the 135 Bereaved Relatives on Day 90 After ICU Discharge

| N (%) or<br>Median [interquartile range]                                         | COVID-19<br>N=78 | Non-COVID-19<br>N=57 |
|----------------------------------------------------------------------------------|------------------|----------------------|
| <b>Primary endpoint</b>                                                          |                  |                      |
| Impact of Event Scale - Revised                                                  | 27 [19-39]       | 18 [8-27]            |
| <i>Proportion of bereaved relatives with PTSD-related symptoms (IES-R&gt;22)</i> | 48/76 (63%)      | 22/56 (39%)          |
| <b>Secondary endpoint</b>                                                        |                  |                      |
| HADS anxiety subscale                                                            | 8 [3-12]         | 4 [2-7]              |
| <i>Proportion of bereaved relatives with symptoms of anxiety (subscale≥7)</i>    | 43 (55%)         | 18 (32%)             |
| HADS depression subscale                                                         | 7 [3-12]         | 4 [1-6]              |
| <i>Proportion of bereaved relatives with symptoms of depression (subscale≥7)</i> | 41/75 (55%)      | 11/55 (20%)          |
|                                                                                  |                  |                      |

**eTable 3.** Characteristics of Patients Who Provided Informed Consent

| <b>N (%) or<br/>Median [interquartile range]</b>                                 | <b>COVID-19<br/>N=178</b> | <b>Non-COVID-19<br/>N=129</b> | <b>P<br/>value</b> |
|----------------------------------------------------------------------------------|---------------------------|-------------------------------|--------------------|
| <b>Male sex</b>                                                                  | 135 (76%)                 | 68 (53%)                      | <.001              |
| <b>Female sex</b>                                                                | 53 (24%)                  | 61 (47%)                      |                    |
| <b>Age</b>                                                                       | 60 [50-68]                | 62 (48-72)                    | .56                |
| <b>Comorbidities</b>                                                             |                           |                               |                    |
| Hypertension                                                                     | 74/177 (42%)              | 43/128 (34%)                  | .15                |
| Diabetes                                                                         | 43/176 (24%)              | 27/127 (21%)                  | .58                |
| Cardiovascular disease                                                           | 26/176 (15%)              | 30/128 (23%)                  | .07                |
| Hematologic malignancy                                                           | 15/176 (9%)               | 31/128 (24%)                  | <.001              |
| Solid organ transplant                                                           | 4/176 (2%)                | 11/128 (9%)                   | .015               |
| Other immunocompromised patients                                                 | 10/176 (6%)               | 28/127 (22%)                  | <.001              |
| <b>Respiratory rate</b>                                                          | 28 [23-32]                | 28 [20-33]                    | .14                |
| <b>PaO<sub>2</sub> / FiO<sub>2</sub> ratio</b>                                   | 99 [84;150]               | 125 [81-219]                  | .13                |
| <b>Need for high flow nasal oxygen within 24 h of ICU admission</b>              | 65/177 (37%)              | 59/128 (45%)                  | .12                |
| <b>Need for noninvasive mechanical ventilation</b>                               | 69/176 (39%)              | 53/126 (42%)                  | .55                |
| <b>Need for endotracheal mechanical ventilation within 24 h of ICU admission</b> | 127/177 (72%)             | 58 (46%)                      | <.001              |
| <b>Need for prone positioning</b>                                                | 100 (56%)                 | 14/126 (11%)                  | <.001              |
| <b>Extracorporeal membrane oxygenation</b>                                       | 6/177 (3%)                | 4/127 (3%)                    | >.99               |
| <b>Duration of invasive mechanical ventilation</b>                               | 15 [11-20]                | 8 [4-11]                      | <.001              |
| <b>Need for vasopressors</b>                                                     | 70/174 (40%)              | 39/128 (30%)                  | .09                |
| <b>Acute kidney injury <sup>Y</sup></b>                                          | 50/176 (28%)              | 38/126 (30%)                  | .80                |
| <b>Renal replacement therapy</b>                                                 | 18/176 (10%)              | 7 (5%)                        | .15                |
| <b>Neurological disturbances at ICU admission <sup>φ</sup></b>                   | 18/175 (10%)              | 29/128 (23%)                  | .004               |
|                                                                                  |                           |                               |                    |

<sup>φ</sup> Neurological disturbances include encephalopathy, dizziness, stroke, movement disorders, motor and sensory deficits, ataxia, and seizures

<sup>Y</sup> Acute kidney injury was defined as an increase in serum creatinine by  $\geq 0.3$  mg/dl ( $>26.5$   $\mu\text{mol/l}$ ) observed within 48 hours; or an Increase in serum creatinine to  $\geq 1.5$  times baseline; or Urine volume  $<0.5$  ml/kg/h for 6 hours

**eTable 4.** Assessment of the Patients on Day 90 After ICU Discharge

| <b>N (%) or<br/>Median (interquartile ranges)</b>                               | <b>COVID-19<br/>N=178</b> | <b>Non-COVID-19<br/>N=129</b> | <b><i>P</i><br/>value</b> |
|---------------------------------------------------------------------------------|---------------------------|-------------------------------|---------------------------|
| <b>Cannot remember the time of ICU admission</b>                                | 77/157 (49%)              | 46/110 (42%)                  | .26                       |
| <b>Report having been sedated in the ICU</b>                                    | 116/155 (75%)             | 56/107 (52%)                  | <.001                     |
| <b>Rating (0 poor-10 excellent) of quality of information</b>                   | 8 [6-9]                   | 8 [6-10]                      | .32                       |
| <b>Rating (0 poor-10 excellent) of clinicians<sup>a</sup> behaviors</b>         | 9 [8-10]                  | 10 [8-10]                     | .79                       |
| <b>Report clinicians<sup>a</sup> were wearing personal protective equipment</b> | 126/156 (81%)             | 48/109 (44%)                  | <.001                     |
| <b>Did not receive any family visit in the ICU</b>                              | 109/157 (69%)             | 10/109 (9%)                   | <.001                     |
| <b>Remote communication with family while in the ICU</b>                        | 87/156 (56%)              | 62/102 (61%)                  | .44                       |
| Over the phone                                                                  | 67 (43%)                  | 58 (57%)                      |                           |
| Using videoconferencing                                                         | 16 (10%)                  | 2 (2%)                        |                           |
| Other                                                                           | 4 (3%)                    | 2 (2%)                        |                           |
| No remote communication                                                         | 69 (44%)                  | 40 (39%)                      |                           |
| <b>Felt lonely (0 not at all - 10 very much so) during the ICU stay</b>         | 5 [1-8]                   | 2 [1-5]                       | .004                      |
| <b>Felt distressed (0 not at all - 10 very much so) during the ICU stay</b>     | 5 [1-8]                   | 5 [1-8]                       | .86                       |
| <b>Rating (0 poor-10 excellent) of symptom control</b>                          | 9 [8-10]                  | 10 [8-10]                     | .29                       |
| <b>Felt they were shunned by ICU clinicians</b>                                 | 1 [1-3]                   | 1 [1-1]                       | .002                      |
| <b>Unemployed</b>                                                               | 20/155 (13%)              | 10/108 (9%)                   | .43                       |
| <b>Rating of own social support</b>                                             | 10 [9-10]                 | 10 [8-10]                     | .24                       |
| <b>Psychotropic drug intake</b>                                                 | 23/156 (15%)              | 20/108 (19%)                  | .50                       |

<sup>a</sup>physicians and nurses

**eTable 5.** Day 90 Outcomes in 307 Surviving Patients

| <b>N (%) or<br/>Median [interquartile range]</b>                       | <b>COVID-19</b>  | <b>Non-COVID-19</b> | <b>P value</b> |
|------------------------------------------------------------------------|------------------|---------------------|----------------|
| <b>Patients</b>                                                        | <b>N=178</b>     | <b>N=129</b>        |                |
| Impact of Event Scale - Revised                                        | 8 [3-19]         | 7 [3-18]            | .59            |
| <i>Proportion of patients with PTSD-related symptoms (IES-R&gt;22)</i> | 30/150 (20%)     | 16/105 (15%)        | .24            |
|                                                                        |                  |                     |                |
| HADS anxiety subscale                                                  | 3 [1-6]          | 5 [2-8]             | .01            |
| <i>Proportion of patients with symptoms of anxiety (subscale≥7)</i>    | 38/154 (25%)     | 38/108 (35%)        | .07            |
| HADS depression subscale                                               | 2 [1-6]          | 3 [1-6]             | .25            |
| <i>Proportion of patients with symptoms of depression (subscale≥7)</i> | 32/148 (22%)     | 26/107 (24%)        | .65            |
| Quality of life (SF-36)                                                |                  |                     |                |
| <i>Mental health component</i>                                         | 54.7 [46.7-60.3] | 53.3 [43.3-58.0]    | .20            |
| <i>Physical health component</i>                                       | 41.7 [31.9-49.8] | 39.3 [24.8-48.7]    | .14            |
|                                                                        |                  |                     |                |

**The presence of PTSD-related symptoms was defined by the proportion of patients with an IES-R>22**

**eTable 6.** Multivariable Analysis: Independent Determinants of Symptoms of Anxiety and Depression in the Family Members

| Odds Ratio associated with                                                                  |        | Odds Ratio for Anxiety<br>(95% Confidence Interval) | Odds Ratio for Depression<br>(95% Confidence Interval) |
|---------------------------------------------------------------------------------------------|--------|-----------------------------------------------------|--------------------------------------------------------|
|                                                                                             |        |                                                     |                                                        |
| Family member of a COVID-19 patient                                                         | No     | 1                                                   | 1                                                      |
|                                                                                             | Yes    | 1.29 (0.87-1.92)                                    | 1.89 (1.19-2.99)                                       |
| Sex                                                                                         | Female | 1                                                   | 1                                                      |
|                                                                                             | Male   | 0.52 (0.33-0.80)                                    | 0.64 (0.39-1.06)                                       |
| Age (per 10-year increase)                                                                  |        | 0.85 (0.75-0.97)                                    | 0.89 (0.76-1.03)                                       |
| Level of social support (0 extremely limited-10 extremely effective) (per additional point) |        | 0.81 (0.74-0.89)                                    | 0.80 (0.73-0.88)                                       |
|                                                                                             |        |                                                     |                                                        |

Hosmer and Lemeshow goodness of fit (GOF) test, P=.51 for anxiety and P=.99 for depression.

A sensitivity analysis that took into account a center effect and another analysis that used a set of data after imputation of missing variables found similar results.

Variables considered for the LASSO step included sex, age, marital status, profession, and social support.

**eTable 7.** Day 90 Outcomes in 517 Family Members of COVID-19 and Non-COVID-19 Patients After Multiple Imputation

| <b>N (%) or<br/>Median [interquartile range]</b>                        | <b>Proportion differences (95% CI)</b> | <b>P value</b> |
|-------------------------------------------------------------------------|----------------------------------------|----------------|
| <b>Family Members</b>                                                   |                                        | <b>P value</b> |
| <b>Primary endpoint</b>                                                 |                                        |                |
| <i>Proportion of relatives with PTSD-related symptoms (IES-R&gt;22)</i> | 16% (9.0-23.0)                         | <.001          |
| <b>Secondary endpoint</b>                                               |                                        |                |
| <i>Proportion of relatives with symptoms of anxiety</i>                 | 9% (0-16)                              | .06            |
| <i>Proportion of relatives with symptoms of depression</i>              | 13% (6-20)                             | <.001          |
|                                                                         |                                        |                |



**eTable 8.** Independent Determinants of PTSD-Related Symptoms in Family Members Including Center Effect

| Odds Ratio associated with                                                                  |        | Odds Ratio<br>(95% Confidence Interval) |
|---------------------------------------------------------------------------------------------|--------|-----------------------------------------|
|                                                                                             |        |                                         |
| Family member of a COVID-19 patient (as compared to a non-COVID-19 patient)                 | No     | 1                                       |
|                                                                                             | Yes    | 1.94 (1.19-3.14)                        |
| Male sex                                                                                    | Female | 1                                       |
|                                                                                             | Male   | 0.39 (0.23-0.67)                        |
| Age (per 10-year increase)                                                                  |        | 0.83 (0.71-0.97)                        |
| Level of social support (0 extremely limited-10 extremely effective) (per additional point) |        | 0.82 (0.74-0.90)                        |
|                                                                                             |        |                                         |

**eTable 9.** Independent Determinants of PTSD-Related Symptoms in Family Members After Multiple Imputation

| <b>Odds Ratio associated with</b>                                                                  |               | <b>Odds Ratio<br/>(95% Confidence Interval)</b> |
|----------------------------------------------------------------------------------------------------|---------------|-------------------------------------------------|
| <b>Family member of a COVID-19 patient (as compared to a non-COVID-19 patient)</b>                 | <b>No</b>     | 1                                               |
|                                                                                                    | <b>Yes</b>    | 2.12 (1.37-3.27)                                |
| <b>Male sex</b>                                                                                    | <b>Female</b> | 1                                               |
|                                                                                                    | <b>Male</b>   | 0.37 (0.22-0.62)                                |
| <b>Age (per 10-year increase)</b>                                                                  |               | 0.85 (0.73-0.98)                                |
| <b>Level of social support (0 extremely limited-10 extremely effective) (per additional point)</b> |               | 0.82 (0.75-0.90)                                |
|                                                                                                    |               |                                                 |

**eTable 10.** Independent Determinants of PTSD-Related Symptoms Defined by Score Greater Than 26

| Odds Ratio associated with                                                                  |        | Odds Ratio<br>(95% Confidence Interval) |
|---------------------------------------------------------------------------------------------|--------|-----------------------------------------|
| Family member of a COVID-19 patient (as compared to a non-COVID-19 patient)                 | No     | 1                                       |
|                                                                                             | Yes    | 2.05 (1.23-3.40)                        |
| Male sex                                                                                    | Female | 1                                       |
|                                                                                             | Male   | 0.31 (0.17-0.59)                        |
| Age (per 10-year increase)                                                                  |        | 0.79 (0.67-0.93)                        |
| Level of social support (0 extremely limited-10 extremely effective) (per additional point) |        | 0.81 (0.73-0.90)                        |
|                                                                                             |        |                                         |

eFigure 1. Study Design

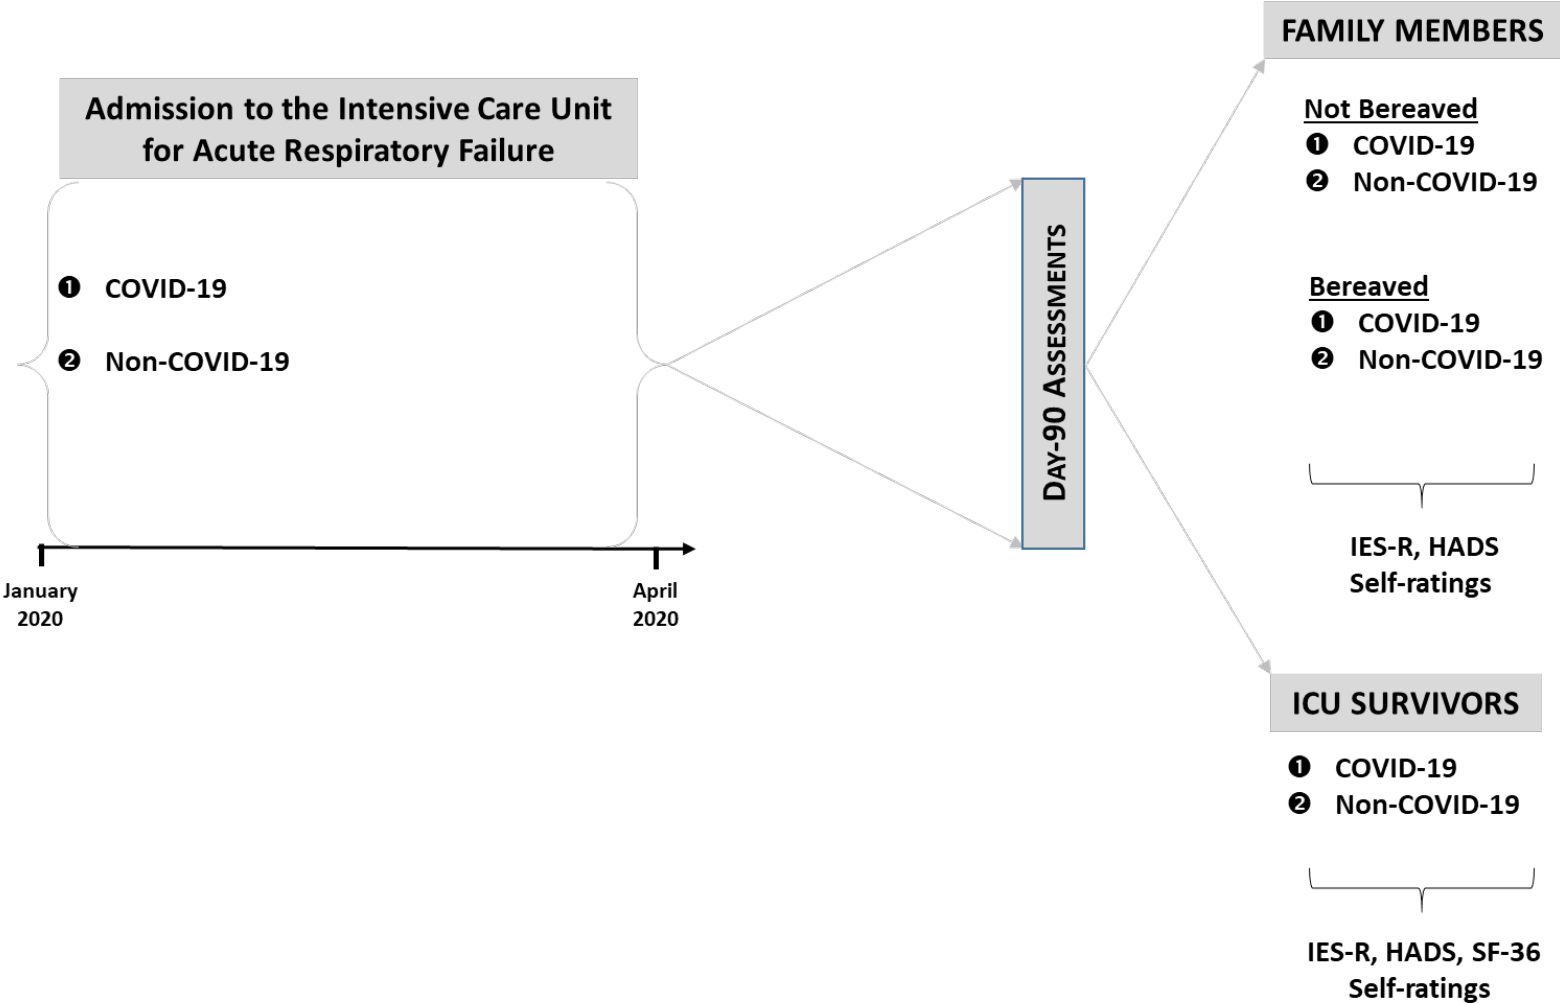

**eFigure 2. Patients' Flow Diagram**

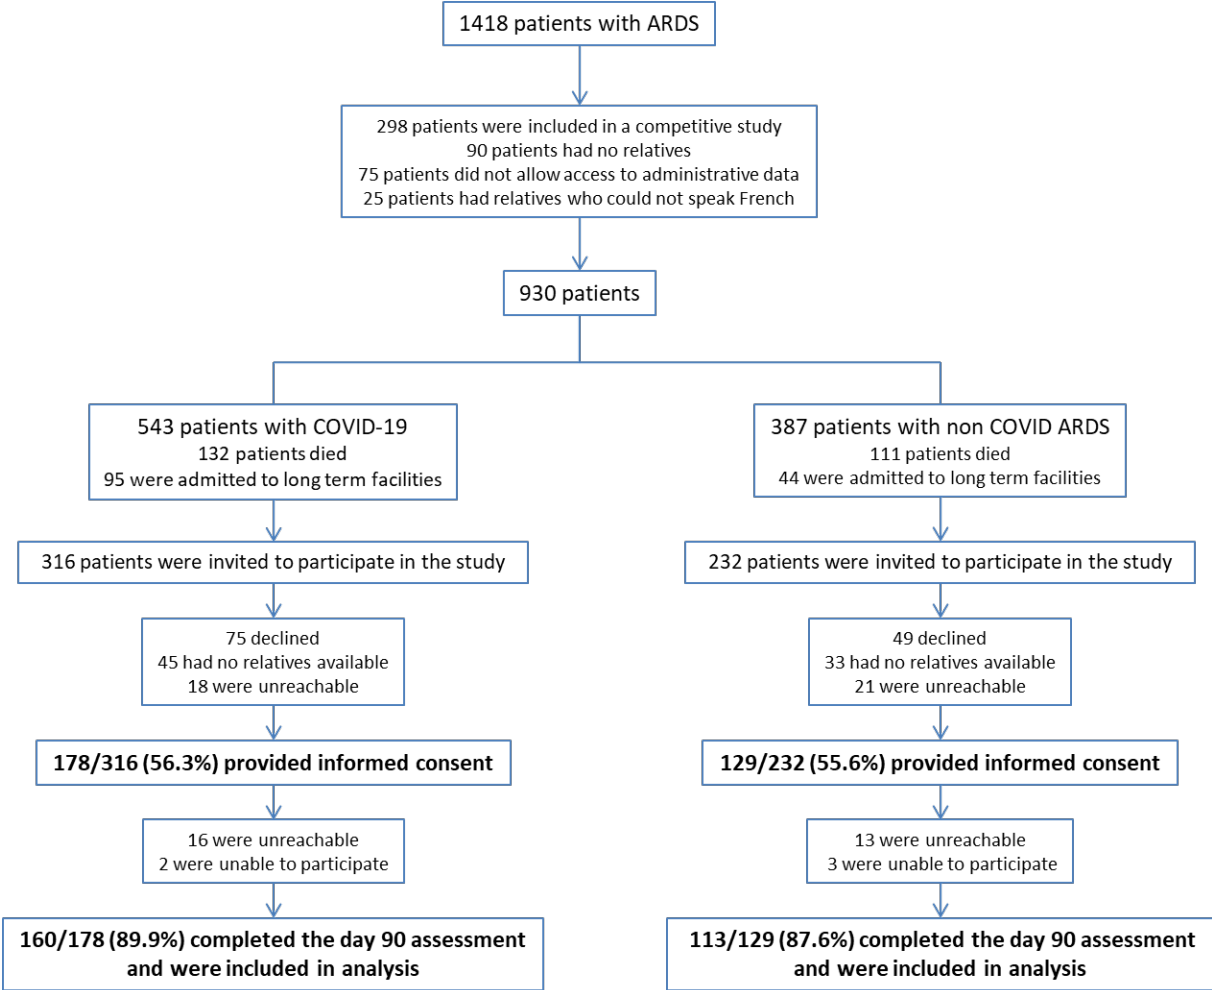

**eFigure 3.** Health-Related Quality of Life in Patients Who Were Alive at 90 Days

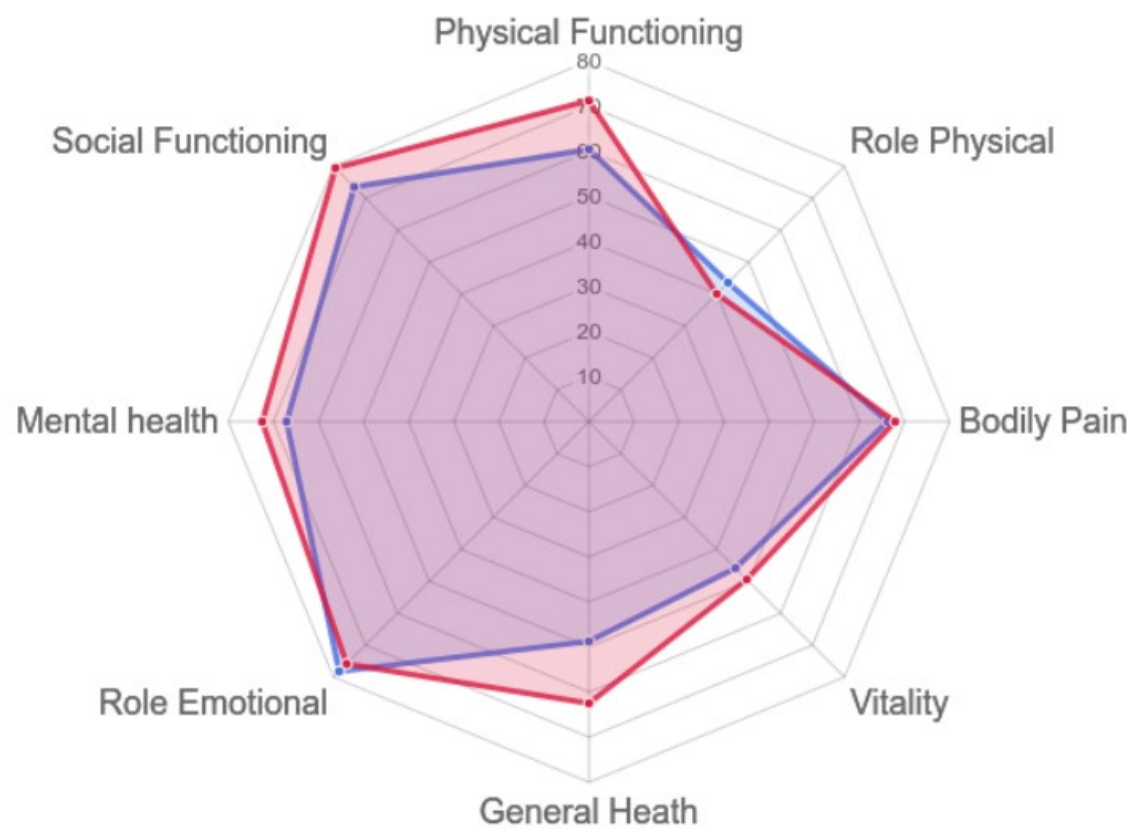

The 8 domains were assessed using the SF-36 instrument during a telephone interview 90 days after ICU discharge in patients with COVID-19 (red) or non-COVID-19 (blue) ARDS.

**eFigure 4.** Mental (Left) and Physical (Right) Components Scores of the SF-36 in Patients With COVID-19 (Red) vs Non-COVID-19 (Blue) ARDS 90 Days After ICU Discharge

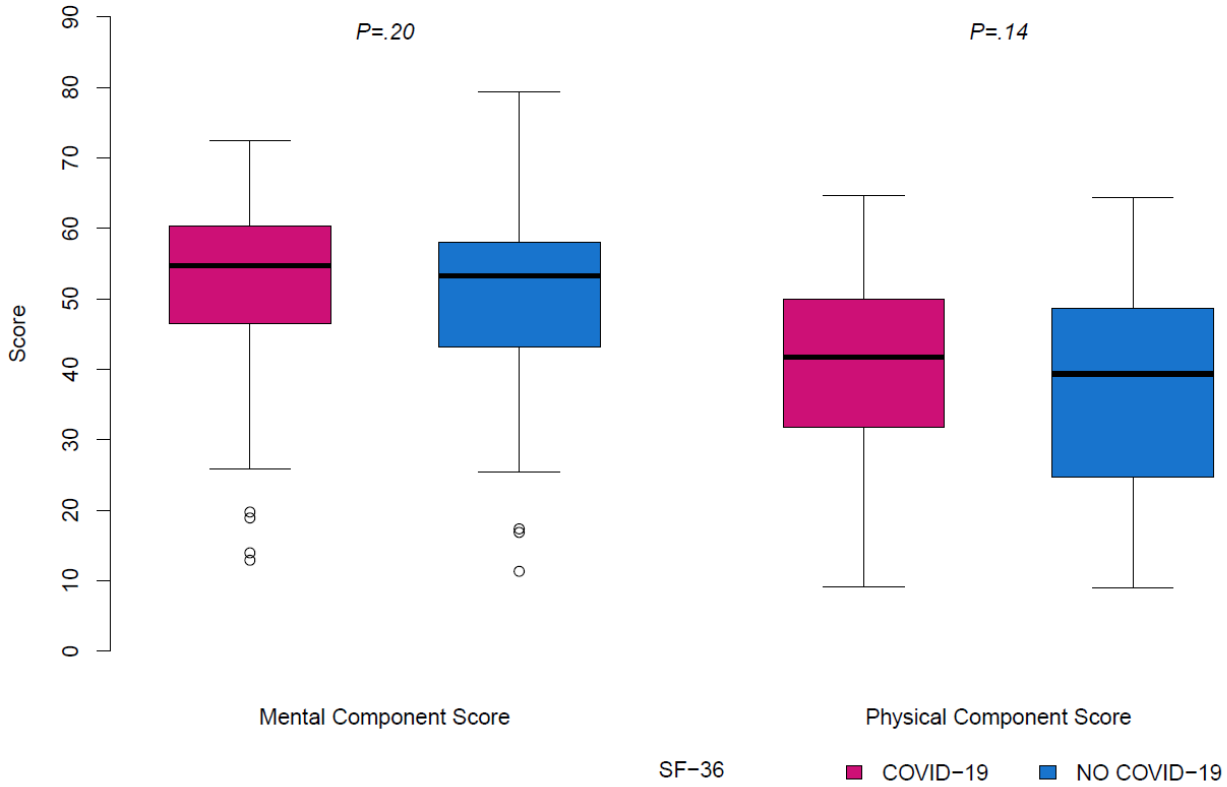

Supplement: jama-e222017-s001.pdf [file jama-e222017-s001.pdf]
